# Supplementary material for: Ruthenium carboranyl complexes with 2,2′-bipyridine derivatives for potential bimodal therapy application
Source: PubMed Central journal article supplement — RSC Adv. 2020 Apr 23;10(28):16266–76. doi: 10.1039/d0ra01522a (PMC9053089; doi:10.1039/d0ra01522a), 2020-04-23
Supplement: RA-010-D0RA01522A-s001.pdf [file RA-010-D0RA01522A-s001.pdf]

**Ruthenium carboranyl complexes with 2,2'-bipyridine derivatives for potential  
bimodal therapy application**

Ricardo G. Teixeira<sup>a</sup>, Fernanda Marques<sup>b</sup>, M. Paula Robalo<sup>c,d</sup>, Xavier Fontrodona<sup>e</sup>, M.  
Helena Garcia<sup>a</sup>, Simonetta Geninatti Crich<sup>f</sup>, Clara Viñas<sup>f,\*</sup>, Andreia Valente<sup>a,\*</sup>

<sup>a</sup>Centro de Química Estrutural and Departamento de Química e Bioquímica, Faculdade de Ciências, Universidade de Lisboa, Campo Grande, 1749-016 Lisboa, Portugal.

<sup>b</sup>Centro de Ciências e Tecnologias Nucleares, Instituto Superior Técnico, Universidade de Lisboa, Estrada Nacional 10, 2695-006 Bobadela LRS, Portugal.

<sup>c</sup>Área Departamental de Engenharia Química, Instituto Superior de Engenharia de Lisboa, Instituto Politécnico de Lisboa, Rua Conselheiro Emídio Navarro, 1, 1959-007 Lisboa, Portugal.

<sup>d</sup>Centro de Química Estrutural, Complexo I, Instituto Superior Técnico, Universidade de Lisboa, Av. Rovisco Pais, 1049-001 Lisboa, Portugal.

<sup>e</sup>Departament de Química and Serveis Tècnics de Recerca, Universitat de Girona, Campus de Montilivi, 17071 Girona, Spain

<sup>f</sup>Dipartimento di Biotecnologie Molecolari e Scienze per la Salute, Università di Torino, via Nizza 52, 10126 Torino, Italy.

<sup>g</sup>Institut de Ciència de Materials de Barcelona (ICMAB-CSIC), Campus U.A.B., 08193 Bellaterra, Spain.

## INDEX

|                                                                                                                                                                                                                                                                                                                                                                                                                                                                         | Page |
|-------------------------------------------------------------------------------------------------------------------------------------------------------------------------------------------------------------------------------------------------------------------------------------------------------------------------------------------------------------------------------------------------------------------------------------------------------------------------|------|
| 1. Characterization of <b>RuCB1</b> .....                                                                                                                                                                                                                                                                                                                                                                                                                               | 1    |
| 2. Characterization of <b>RuCB2</b> .....                                                                                                                                                                                                                                                                                                                                                                                                                               | 4    |
| <b>Table S1.</b> <sup>1</sup> H NMR data (ppm) in acetone- <i>d</i> <sub>6</sub> for compounds <b>RuCB1</b> and <b>RuCB2</b> , respective bipyridyl ligands and ruthenacarborane precursor.....                                                                                                                                                                                                                                                                         | 7    |
| <b>Table S2.</b> <sup>11</sup> B{ <sup>1</sup> H} NMR data in acetone- <i>d</i> <sub>6</sub> for compounds <b>RuCB1</b> and <b>RuCB2</b> .....                                                                                                                                                                                                                                                                                                                          | 7    |
| <b>Table S3.</b> Optical spectral data for complexes <b>RuCB1</b> and <b>RuCB2</b> in different solvents. Measurements were performed at room temperature using 10 <sup>-4</sup> -10 <sup>-5</sup> M solutions. ....                                                                                                                                                                                                                                                    | 8    |
| <b>Table S4.</b> Electrochemical data for complexes [3,3,3-(CO) <sub>3</sub> -closo-3,1,2-RuC <sub>2</sub> B <sub>9</sub> H <sub>11</sub> ], <b>RuCB1</b> and <b>RuCB2</b> in acetonitrile and dichloromethane (all values vs. SCE, <i>v</i> = 100 mVs <sup>-1</sup> ). ....                                                                                                                                                                                            | 8    |
| <b>Table S5.</b> Crystallographic Data and Structural Refinement Details for <b>RuCB1</b> and <b>RuCB2</b> . ....                                                                                                                                                                                                                                                                                                                                                       | 9    |
| <b>Figure S11.</b> Stability studies in cellular media, 3% DMSO / 97 % DMEM for compounds <b>RuCB1</b> (A) and <b>RuCB2</b> (B). ....                                                                                                                                                                                                                                                                                                                                   | 10   |
| <b>Figure S12.</b> (A) <i>In vitro</i> uptake experiments on A375 cells that were incubated for 24 h at 37 °C in the presence of increasing amounts of <b>RuCB1</b> and <b>RuCB2</b> . B content in the cell samples was determined by ICP-MS, and values were normalized to the protein content of each cell sample. (B) Cells % viability evaluated by measuring the protein content for each treated cell samples with respect to a not treated control sample. .... | 11   |

## 1. Characterization of RuCB1

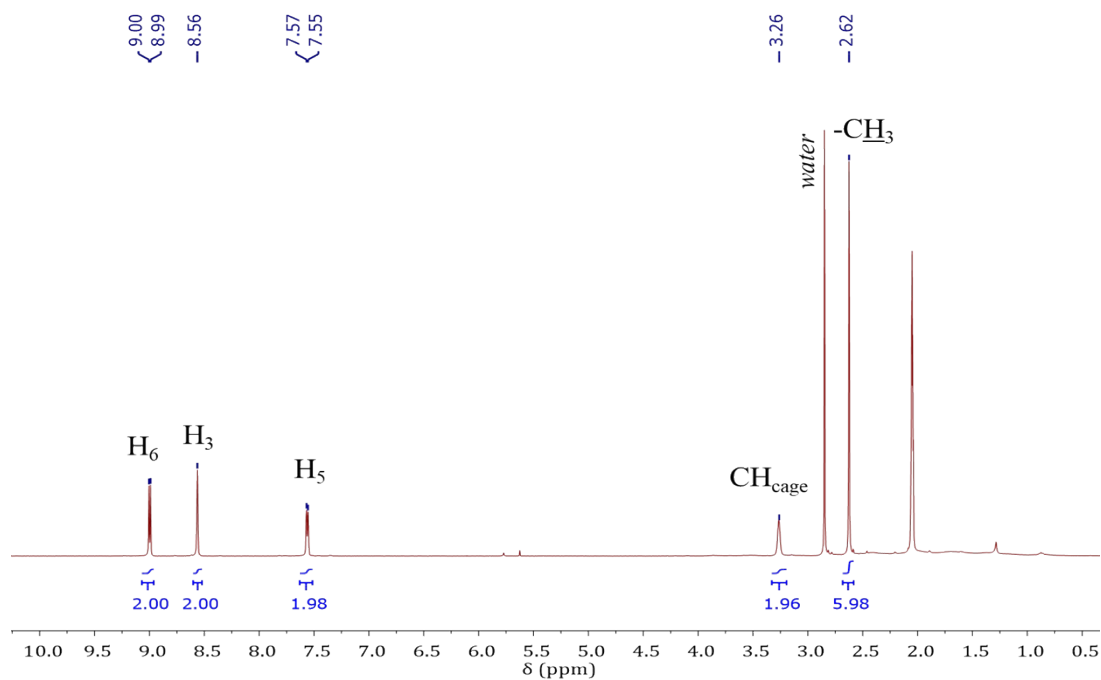

**Figure S1.**  $^1\text{H}$  NMR spectrum of [3-CO-3,3- $\{k^2$ -4,4'-( $\text{CH}_3$ ) $_2$ -2,2'-bipy $\}$ -*closo*-3,1,2-Ru $\text{C}_2\text{B}_9\text{H}_{11}$ ] (**RuCB1**) in acetone- $d_6$  at 298 K (400 MHz) using TMS as reference.

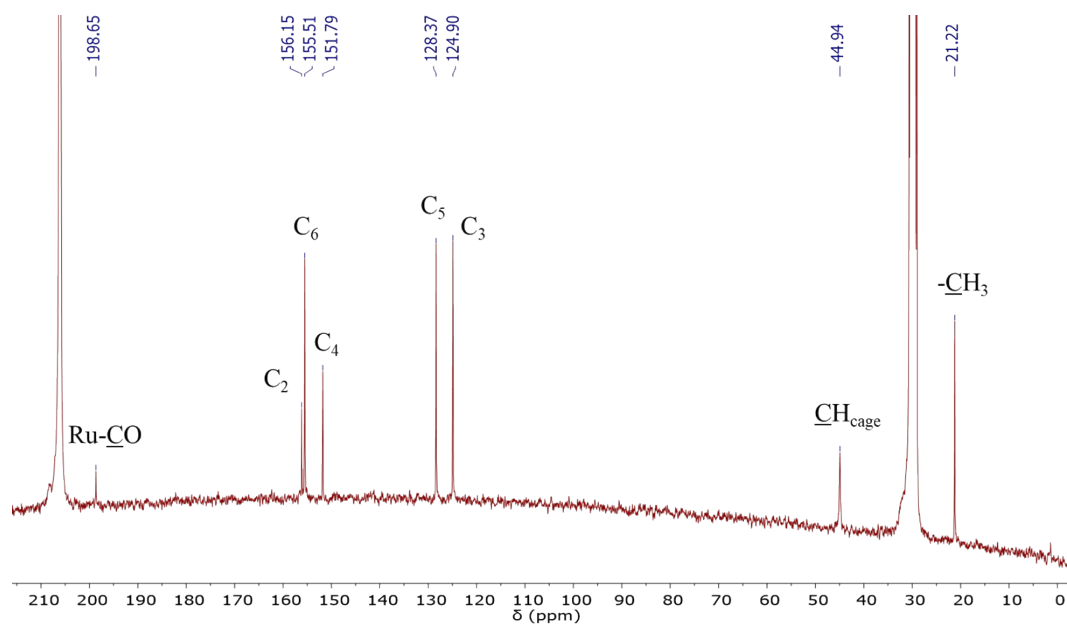

**Figure S2.**  $^{13}\text{C}$  NMR spectrum of [3-CO-3,3- $\{k^2$ -4,4'-( $\text{CH}_3$ ) $_2$ -2,2'-bipy $\}$ -*closo*-3,1,2-Ru $\text{C}_2\text{B}_9\text{H}_{11}$ ] (**RuCB1**) in acetone- $d_6$  at 298 K (400 MHz) using TMS as reference.

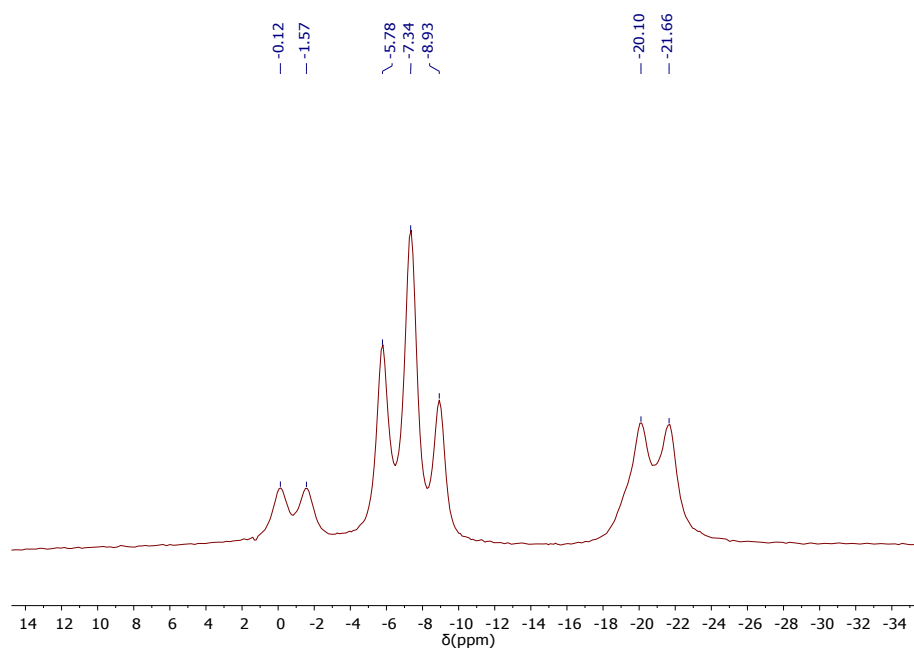

**Figure S3.**  $^{11}\text{B}$  NMR spectrum of [3-CO-3,3- $\{k^2\text{-}4,4'\text{-(CH}_3\text{)}_2\text{-}2,2'\text{-bipy}\}$ -*closo*-3,1,2-Ru $\text{C}_2\text{B}_9\text{H}_{11}$ ] (**RuCB1**) in acetone- $d_6$  at 298 K (300 MHz) using  $\text{BF}_3\cdot\text{OEt}_2$  as reference.

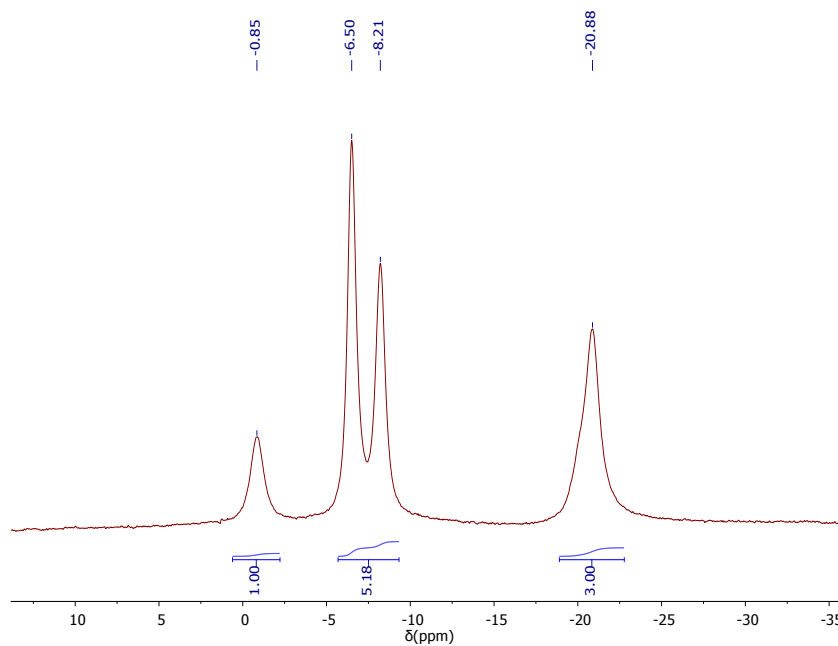

**Figure S4.**  $^{11}\text{B}\{^1\text{H}\}$  NMR spectrum of [3-CO-3,3- $\{k^2\text{-}4,4'\text{-(CH}_3\text{)}_2\text{-}2,2'\text{-bipy}\}$ -*closo*-3,1,2-Ru $\text{C}_2\text{B}_9\text{H}_{11}$ ] (**RuCB1**) in acetone- $d_6$  at 298 K (300 MHz) using  $\text{BF}_3\cdot\text{OEt}_2$  as reference.

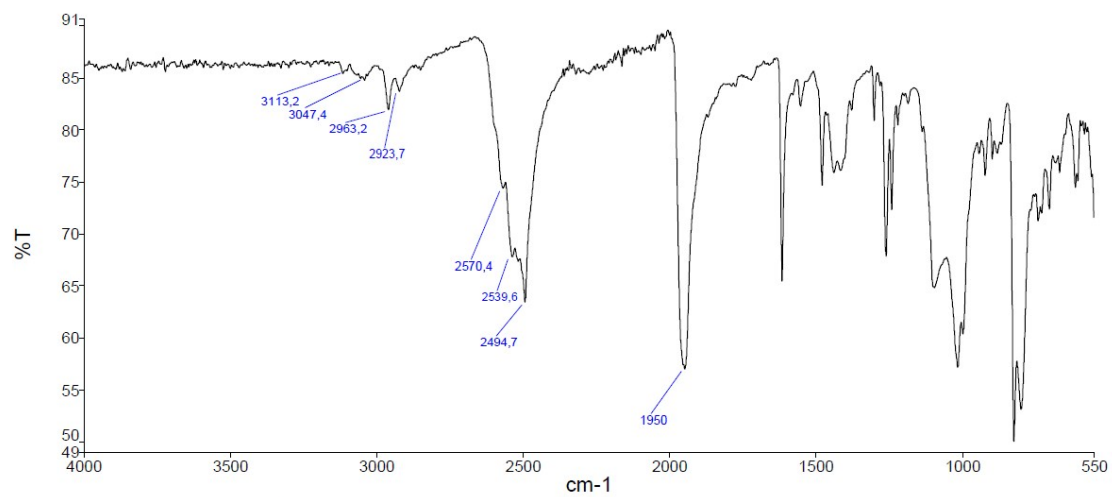

**Figure S5.** FTIR spectrum of [3-CO-3,3-{ $k^2$ -4,4'-(CH<sub>3</sub>)<sub>2</sub>-2,2'-bipy}-closo-3,1,2-RuC<sub>2</sub>B<sub>9</sub>H<sub>11</sub>] (**RuCB1**); KBr pellets.

## 2. Characterization of RuCB2

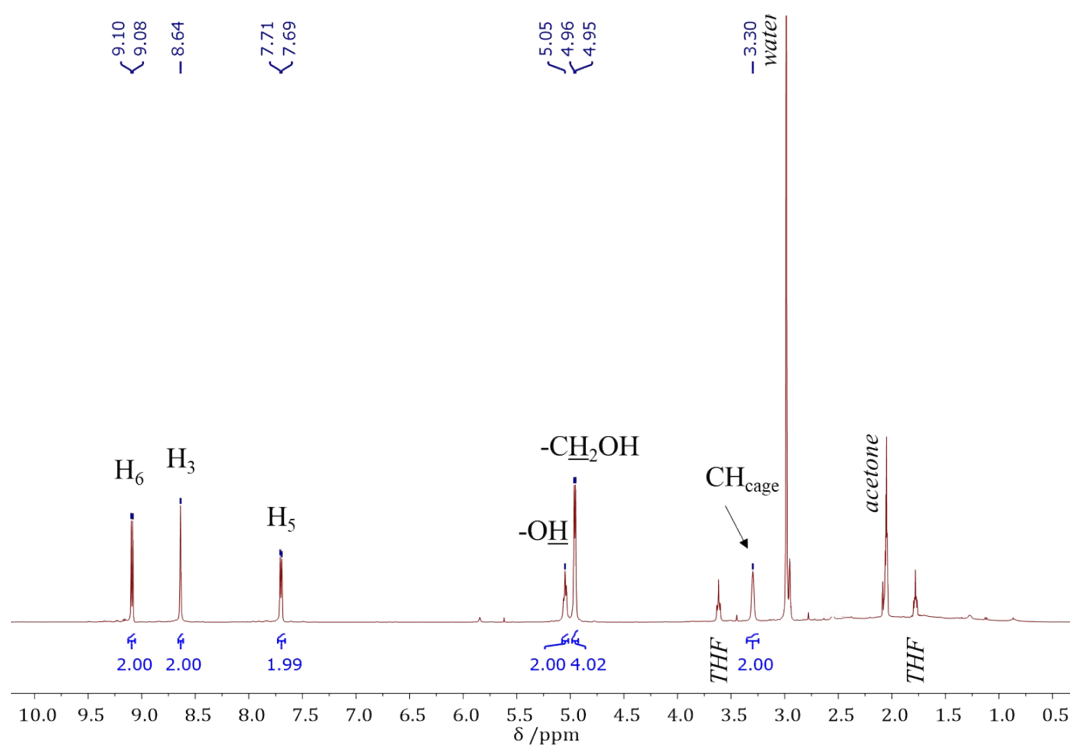

**Figure S6.**  $^1\text{H}$  NMR spectrum of [3-CO-3,3-{ $k^2$ -4,4'-( $\text{CH}_3$ ) $_2$ -2,2'-bipy}-closo-3,1,2-Ru $_2$ B $_9$ H $_{11}$ ] (**RuCB2**) in acetone- $d_6$  at 298 K (400 MHz) using TMS as reference.

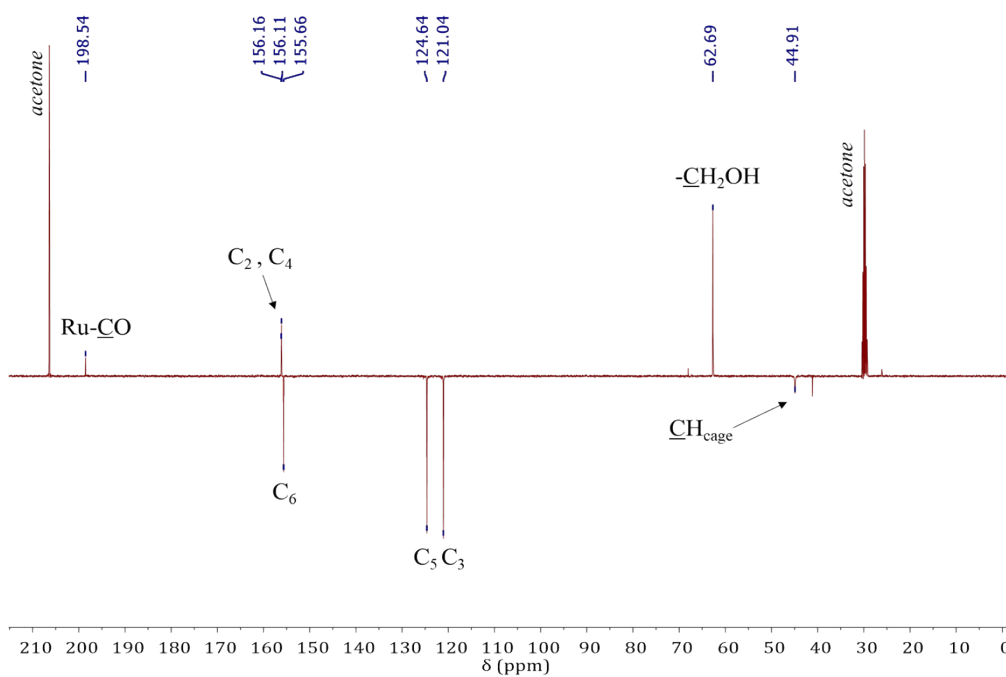

**Figure S7.**  $^{13}\text{C}$  NMR spectrum of [3-CO-3,3-{ $k^2$ -4,4'-( $\text{CH}_3$ ) $_2$ -2,2'-bipy}-closo-3,1,2-Ru $_2$ B $_9$ H $_{11}$ ] (**RuCB2**) in acetone- $d_6$  at 298 K (400 MHz) using TMS as reference.

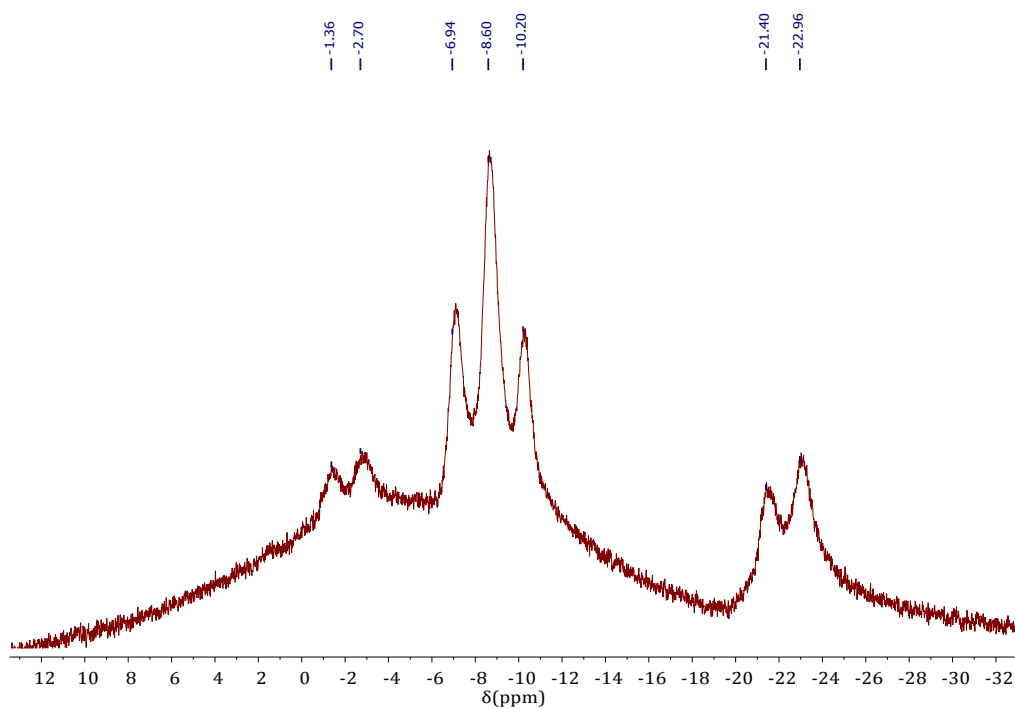

**Figure S8.**  $^{11}\text{B}$  NMR spectrum of [3-CO-3,3-{ $k^2$ -4,4'-( $\text{CH}_3$ ) $_2$ -2,2'-bipy}-closo-3,1,2-Ru $\text{C}_2\text{B}_9\text{H}_{11}$ ] (**RuCB2**) in acetone- $\text{d}_6$  at 298 K (300 MHz) using  $\text{BF}_3 \cdot \text{OEt}_2$  as reference.

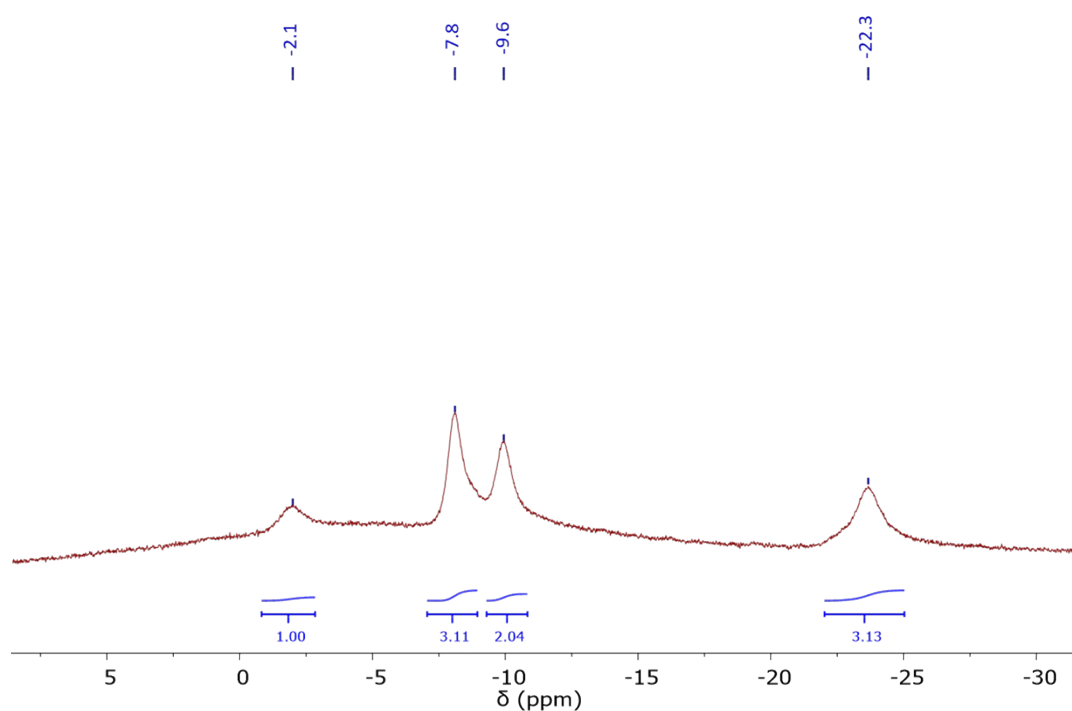

**Figure S9.**  $^{11}\text{B}\{^1\text{H}\}$  NMR spectrum of [3-CO-3,3-{ $k^2$ -4,4'-( $\text{CH}_3$ ) $_2$ -2,2'-bipy}-closo-3,1,2-Ru $\text{C}_2\text{B}_9\text{H}_{11}$ ] (**RuCB2**) in acetone- $\text{d}_6$  at 298 K (300 MHz) using  $\text{BF}_3 \cdot \text{OEt}_2$  as reference.

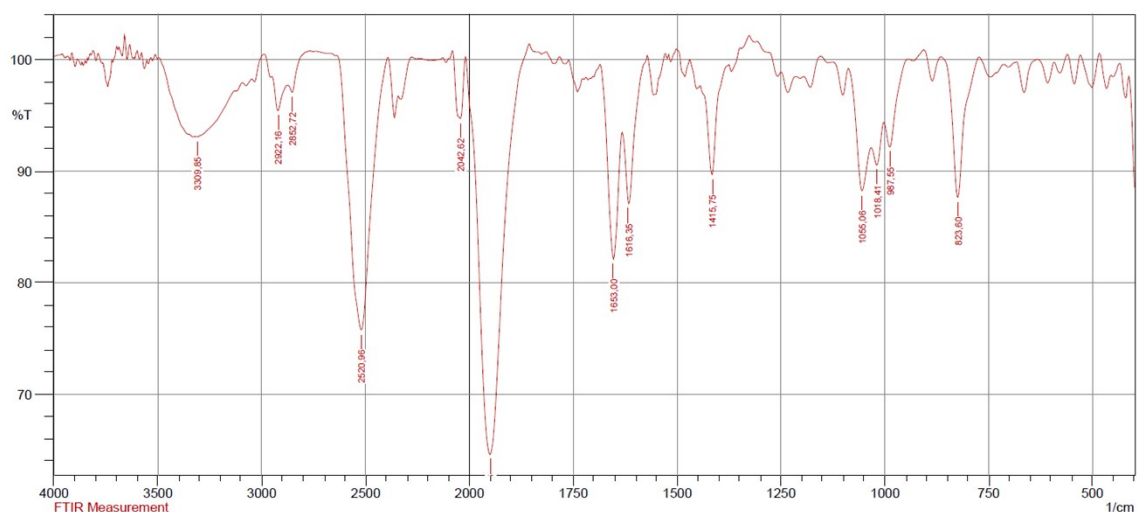

**Figure S10.** FTIR spectrum of [3-CO-3,3-{k<sup>2</sup>-4,4'-(CH<sub>2</sub>OH)<sub>2</sub>-2,2'-bipy}-closo-3,1,2-RuC<sub>2</sub>B<sub>9</sub>H<sub>11</sub>] (**RuCB2**); KBr pellets.



**Table S1.**  $^1\text{H}$  NMR data (ppm) in acetone- $d_6$  for compounds **RuCB1** and **RuCB2**, respective bipyridyl ligands and ruthenacarborane precursor.

| Compound                                                                                         | Carboranyl |                | Bipyridine     |                |      |
|--------------------------------------------------------------------------------------------------|------------|----------------|----------------|----------------|------|
|                                                                                                  | cage       | H <sub>3</sub> | H <sub>5</sub> | H <sub>6</sub> | R    |
| 4,4'-dimethyl-2,2'-bipyridyl                                                                     | -          | 8.30           | 7.22           | 8.51           | 2.43 |
| 4,4'-dihydroxymethyl-2,2'-bipyridyl                                                              | -          | 8.50           | 7.39           | 8.60           | 4.79 |
| [3,3,3-(CO) <sub>3</sub> - <i>closo</i> -3,1,2-RuC <sub>2</sub> B <sub>9</sub> H <sub>11</sub> ] | 4.15       | -              | -              | -              | -    |
| <b>RuCB1</b>                                                                                     | 3.26       | 8.56           | 7.56           | 9.00           | 2.62 |
| <b>RuCB2</b>                                                                                     | 3.30       | 8.64           | 7.70           | 9.09           | 4.96 |

**Table S2.**  $^{11}\text{B}\{^1\text{H}\}$  NMR data in acetone- $d_6$  for compounds **RuCB1** and **RuCB2**. In parenthesis, the correspondent integral area of each  $^{11}\text{B}\{^1\text{H}\}$  NMR peak.

| Compound                                                                                         | $^{11}\text{B}\{^1\text{H}\}$ NMR            | $\langle\delta\rangle$ |
|--------------------------------------------------------------------------------------------------|----------------------------------------------|------------------------|
| [3,3,3-(CO) <sub>3</sub> - <i>closo</i> -3,1,2-RuC <sub>2</sub> B <sub>9</sub> H <sub>11</sub> ] | 8.6 (1B), -4.2 (3B), -7.6 (2B), -16.7 (3B)   | -7.7                   |
| <b>RuCB1</b>                                                                                     | -0.9 (1B), -6.5 (3B), -8.21 (2B), -20.9 (3B) | -11.1                  |
| <b>RuCB2</b>                                                                                     | -2.1 (1B), -7.8 (3B), -9.6 (2B), -22.3 (3B)  | -12.4                  |

**Table S3.** Optical spectral data for complexes **RuCB1** and **RuCB2** in different solvents. Measurements were performed at room temperature using  $10^{-4}$ - $10^{-5}$  M solutions. (Sh = Shoulder).

| Compound     | $\lambda_{\max}/\text{nm}$ ( $\epsilon \times 10^3 / \text{M}^{-1}\text{cm}^{-1}$ ) |                                                  |
|--------------|-------------------------------------------------------------------------------------|--------------------------------------------------|
|              | Dichloromethane                                                                     | Dimethylsulfoxide                                |
| <b>RuCB1</b> | 246 (11.28), 287 (10.25), 311 (Sh), 362 (2.74), 451 (0.60)                          | 283 (18.71), 311 (13.01), 350 (5.80), 438 (1.35) |
| <b>RuCB2</b> | 245 (18.92), 289 (16.84), 314 (Sh), 368 (4.33), 453 (1.07)                          | 284 (16.06), 313 (10.45), 347 (4.32), 434 (1.08) |

**Table S4.** Electrochemical data for complexes **[3,3,3-(CO)<sub>3</sub>-closo-3,1,2-RuC<sub>2</sub>B<sub>9</sub>H<sub>11</sub>]**, **RuCB1** and **RuCB2** in acetonitrile and dichloromethane (all values vs. SCE,  $\nu = 100$  mVs<sup>-1</sup>).

| Compound                                                                               | $E_{\text{pa}}$ (V) | $E_{\text{pc}}$ (V) | $E_{1/2}$ (V) | $E_{\text{pa}} - E_{\text{pc}}$ (mV) | $I_{\text{c}}/I_{\text{a}}$ |
|----------------------------------------------------------------------------------------|---------------------|---------------------|---------------|--------------------------------------|-----------------------------|
| <b>Acetonitrile</b>                                                                    |                     |                     |               |                                      |                             |
| <b>[3,3,3-(CO)<sub>3</sub>-closo-3,1,2-RuC<sub>2</sub>B<sub>9</sub>H<sub>11</sub>]</b> | --                  | -1.36               | --            | --                                   | --                          |
| <b>RuCB1</b>                                                                           | 1.12                | --                  | --            | --                                   | --                          |
|                                                                                        | --                  | -1.45               | --            | --                                   | --                          |
|                                                                                        | -1.50               | -1.58               | -1.54         | 80                                   | 0.9 <sup>a</sup>            |
| <b>RuCB2</b>                                                                           | 1.16                | --                  | --            | --                                   | --                          |
|                                                                                        | --                  | -1.50               | --            | --                                   | --                          |
|                                                                                        | --                  | -1.59               | --            | --                                   | --                          |
| <b>Dichloromethane</b>                                                                 |                     |                     |               |                                      |                             |
| <b>RuCB1</b>                                                                           | 1.12                | 1.00                | 1.06          | 120                                  | 0.5                         |
|                                                                                        | --                  | -1.60               | --            | --                                   | --                          |
|                                                                                        | --                  | -1.69               | --            | --                                   | --                          |
| <b>RuCB2</b>                                                                           | 1.17                | --                  | --            | --                                   | --                          |
|                                                                                        | --                  | -1.60               | --            | --                                   | --                          |
|                                                                                        | --                  | --                  | --            | --                                   | --                          |

<sup>a</sup>  $I_{\text{a}}/I_{\text{c}}$

**Table S5.** Crystallographic Data and Structural Refinement Details for **RuCB1** and **RuCB2**.

|                                            | <b>RuCB1</b>        | <b>RuCB2</b>        |
|--------------------------------------------|---------------------|---------------------|
| Empirical formula                          | C15 H23 B9 N2 O Ru  | C18 H26 B9 N2 O3 Ru |
| Formula weight                             | 445.71              | 516.77              |
| Temperature (K)                            | 193(2)              | 193(2)              |
| Crystal system                             | Monoclinic          | Monoclinic          |
| space group                                | P 2 <sub>1</sub> /n | P 2 <sub>1</sub> /c |
| a (Å)                                      | 12.589(2)           | 6.8160(14)          |
| b (Å)                                      | 11.463(2)           | 25.702(5)           |
| c (Å)                                      | 14.575(2)           | 12.914(3)           |
| β (deg)                                    | 111.301(2)          | 92.384(4)           |
| Volume (Å <sup>3</sup> )                   | 1959.7(6)           | 2260.4(8)           |
| Z                                          | 4                   | 4                   |
| Calculated density ( g cm <sup>-3</sup> )  | 1.511               | 1.518               |
| Absorption coefficient (mm <sup>-1</sup> ) | 0.808               | 0.718               |
| Goodness-of-fit                            | 1.031               | 1.064               |
| R <sub>1</sub> [I>2σ(I)]                   | 0.0308              | 0.0391              |
| wR <sub>2</sub> [I>2σ(I)]                  | 0.0745              | 0.1149              |

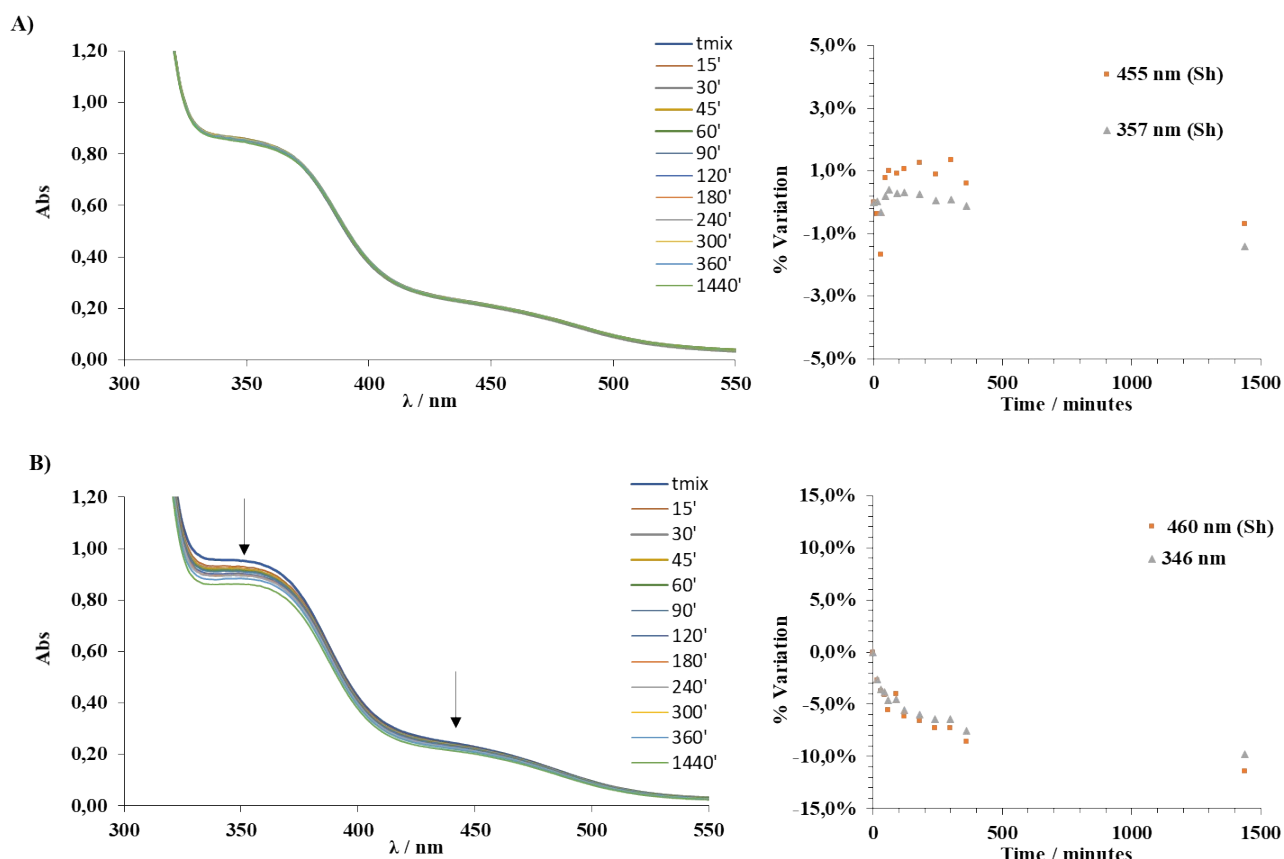

**Figure S11.** Stability studies in cellular media, 3% DMSO / 97 % DMEM for compounds **RuCB1 (A)** and **RuCB2 (B)**. On the right are represented the UV-Vis spectra along the 24 h of the study and on the left the percentage of variation for fixed wavelengths along time.

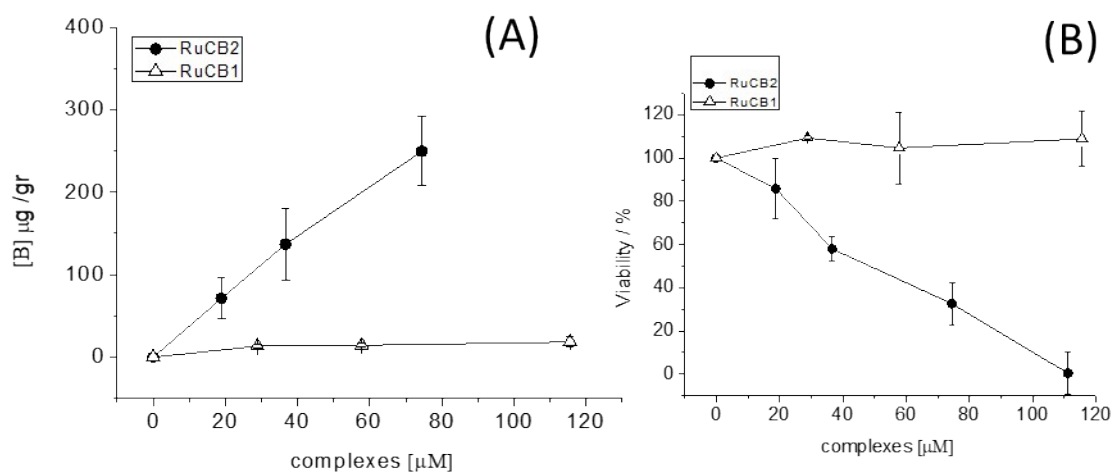

**Figure S12. (A)** *In vitro* uptake experiments on A375 cells that were incubated for 24 h at 37 °C in the presence of increasing amounts of **RuCB1** and **RuCB2**. B content in the cell samples was determined by ICP-MS, and values were normalized to the protein content of each cell sample. **(B)** Cells % viability evaluated by measuring the protein content for each treated cell samples with respect to a not treated control sample. Errors bars report the standard deviation (SD) of the data.
